1 **Title page**

2 **Dose assessment in dental cone beam computed tomography: comparison of**  
3 **optically stimulated luminescence dosimetry with the Monte Carlo method**

4  
5  
6 Chena Lee<sup>1¶</sup>, Jeongmin Yoon<sup>2¶</sup>, Sang-Sun Han<sup>1\*</sup>, Ji Yeon Na<sup>1&</sup>, Jeong-Hee Lee<sup>1&</sup>, Young Hyun Kim<sup>1&</sup>,  
7 Jae Joon Hwang<sup>3&</sup>  
8

9 <sup>1</sup>Department of Oral and Maxillofacial Radiology, Yonsei University College of Dentistry, Seoul,  
10 Republic of Korea

11 <sup>2</sup> Department of Radiation Oncology, Seoul National University Hospital, Seoul, Republic of Korea.

12 <sup>3</sup> Department of Oral and Maxillofacial Radiology, School of Dentistry, Pusan National University,  
13 Yangsan, Korea.

14 Chena Lee and Jeongmin Yoon contributed equally as the first authors.

15  
16 **\*Corresponding to; Sang-Sun Han, DDS., PhD.**

17 Department of Oral and Maxillofacial Radiology, Yonsei University, College of Dentistry

18 50-1 Yonsei-ro Seodaemun-gu, Seoul, Korea, 03722

19 Phone: 82-2-2228-8843

20 Fax: 82-2-363-5232

21 E-mail; [sshan@yuhs.ac](mailto:sshan@yuhs.ac)

22 <sup>¶</sup>These authors contributed equally to this work.

23 <sup>&</sup>These authors also contributed equally to this work.

24 **Abstract**

25 The usage and the model variety of CBCT machine has been rapidly increasing, the dose evaluation  
26 of individual devices became an important issue. Patient dose from CBCT was assessed with two  
27 different methods, optically stimulated luminescence dosimeter (OSLD) measured and monte carlo  
28 (MC) simulation, in four different examination modes. Through the measurement process and obtained  
29 value, more practical and efficient method in acquiring CBCT effective dose would be suggested.  
30 Twenty-five OSLD were calibrated and equipped in human phantom of head and neck organs. This was  
31 exposed on 2 CBCT units, CS9300 (Carestream Dental LLC, Atlanta, Georgia) and RAYSCAN  $\alpha$ +  
32 (Ray Co. Ltd, Hwaseong-si, Korea) with 2 different examination modes. Dose recorded in dosimetry  
33 was obtained and organ dose as well as an effective dose were obtained in each units of examination  
34 modes. Those values were also calculated using MC software, PCXMC (STUK, Helsinki, Finland). The  
35 organ doses and effective doses from both methods were compared by each examination mode of  
36 individual unit. OSLD measured effective dose value was higher than that obtained with MC method  
37 in each examination mode, except dual jaw mode of CS9300. The percent difference of effective dose  
38 between the two methods were ranged from 4.0 to 14.3 %. The dose difference between the methods  
39 was decreased as the examination FOV decreased. Organ dose values were varied according to the  
40 method, while overall trend was similar in both methods. The organs showing high dose were mostly  
41 consistent in both methods. In this study, the effective dose obtained by OSLD measurement and MC  
42 simulation were compared and both methods were described in detail. Consequently, as relatively  
43 efficient and easy-handling method, we carefully suggest MC simulation for further dose evaluation.

44

## 45 **Introduction**

46 Radiation in dental diagnostic examination is relatively low compared to that of medical [1, 2].  
47 However, as cone beam computed tomography (CBCT) became largely performed for various purposes  
48 in dental clinics, we cannot say radiation dose in dentistry is very low any more.  
49 Although patient's overall radiation dose increased in dentistry, dose evaluation method is not  
50 developed very much. Dose measurement with thermoluminescent dosimetry (TLD) has been traditional  
51 method and most dental radiation dose researches were based on this method up to date [3]. There  
52 is recent trend of displacing TLD with optically stimulated luminescence dosimeter (OSLD) or metal  
53 oxide semiconductor field effect transistor (MOSFET) [4, 5]. MOSFET provides fast reading of dosage  
54 as it connected to the electronic probe directly. While it has been widely acceptable for dosimetry in  
55 radiotherapy, due to its suitability for high range of dose [6].

56 The basic phenomenological fundamentals of OSLD and TLD are the same while the TLD releases  
57 the energy, which was stored during irradiation, by heat and OSLD dose by light [7]. There are several  
58 advantages of OSLD over TLD such as, high sensitivity, preciseness and simple dosimeter preparation  
59 and readout. Based on these, a few literatures performed dose measurement with OSLD and they  
60 reported it showed reliable result compared to the TLD method [8]. Still, TLD has been a common  
61 dosimetry in dental field for a long time and there are not many studied based on OSLD measurement,  
62 yet.

63 Monte carlo (MC) method is another dose assessment method which simulate x-ray photon  
64 interaction with body organs and calculate overall effective dose. This method simulates virtual photon  
65 interaction on human phantom and expect radiation dose. Such method is advantageous in that it is  
66 simple to use since calibration and readout procedure are not required and the result is not dependent  
67 on the dosimeter types or its location in phantom [9]. However, this simulation is correct when it is  
68 based on the correct machine and radiation beam geometry, such as distance between the x-ray source  
69 to patient, beam rotation angle or vertical angle of x-ray beam. According to the incorrect combination  
70 of those factors, effective dose might show up to 51.24% difference compared to the TLD measured

71 value [10].

72 Both OSLD measurement and MC simulation method are the short of data reported in dental x-ray  
73 equipment at present [10, 11]. More research on the newly introduced method, OSLD or MC calculation,  
74 compared to the traditional dosimetry should be performed to prove efficiency of these methods. In  
75 fact, as far as the authors know, there are no English reported study on dose assessment in comparison  
76 of MC method and OSLD method in the dental field.

77 In this study, patient dose from CBCT was assessed with two different methods, OSLD measured  
78 and MC simulation, in two different CBCT units with different examination modes. Through the  
79 measurement process and obtained value, more practical and efficient method in acquiring CBCT  
80 effective dose would be suggested.

81

## 82 **Material and methods**

### 83 **1. Cone beam CT (CBCT) machines and examination protocols**

84 The CBCT equipment used were CS9300 (Carestream Dental LLC, Atlanta, Georgia) and  
85 RAYSCAN  $\alpha+$  CBCT (Ray Co. Ltd, Hwaseong-si, Korea).

86 The examination modes of individual units used in this study were as followed; In CS9300, facial  
87 mode (FOV = 17x 13.5 cm), dual jaw mode (FOV = 10 x 10 cm); In RAYSCAN  $\alpha+$ , large jaw mode  
88 (field-of-view, FOV = 16 x 10 cm), jaw mode (FOV = 10 x 10 cm). The detailed exposure conditions  
89 for each mode were described in Table 1. The machine geometry for MC simulation were also described  
90 as suggested by individual manufacturer.

### 91 **2. OSLD measurement**

92 OSLD is a plastic disk containing aluminum oxide doped with carbon (Al<sub>2</sub>O<sub>3</sub>:C). This dosimetry  
93 absorbs radiation and this stored energy can be read out with light stimulation [12]. The dosimetry  
94 efficiently releases stored energy when stimulate with light of 540nm, still wide range of light can  
95 stimulate energy release thus the disk was encased in plastic holder. Each holder case was tagged with  
96 quick response (QR) code for identification

97 of respective OSLD (Fig 1a).

98 Total 22 OSLDs (nano-Dot, Landauer, Inc., Glenwood, IL) were placed in head and neck organs of  
99 adult head phantom (ATOM, CIRS, Norfolk, VA). This phantom was composed of tissue equivalent  
100 material and for each anatomy, there was slot for dosimetry placement (Fig. 1b). Details of the OSLD  
101 locations and corresponding tissues were described in Fig 2.

102 Phantom equipped with OSLD was exposed with four different examination modes (facial, dual jaw,  
103 large jaw and jaw) of two different units (CS9300 and RAYSCAN  $\alpha$ +). All exposures were performed  
104 for twice and read dose values were averaged for the further calculation.

105 The reader (MicroStar; Landauer) was prepared to be optimized for 80 kilovoltage and low dose type  
106 (<30 mGy) and each dosimetry was identified with QR code and read out (Fig. 1c). The values were  
107 acquired as a photon counts with an accuracy of approximate  $\pm 2\%$  and this was converted to the dose  
108 in mGy unit using an energyspecific conversion factor. Those were converted into organ dose, mostly  
109 following the method done by Loudlow et al [8].

110 When multiple OSLDs were used for one organ, the average value was used. For example, the mean  
111 value of fronto-parietal lobe, parieto-occipital lobe, fornix and pituitary were used for brain dose. Bone  
112 marrow dose was obtained considering its distribution in mandible (0.8%), calvaria (7.7%) and cervical  
113 spine (3.8%) [13]. Bone surface dose were obtained with using coefficient, bone-to-muscle attenuation  
114 ratio, multiplied with bone marrow value. The equation for the coefficient was as followed:  $-0.0618 \times$   
115  $kV(p) \times 2/3 + 6.9406$  [14]. The irradiated proportion of skin, lymphatic nodes and muscles on head and  
116 neck region are estimated as 5% and esophagus as 10% of the whole body and this was taken  
117 consideration in organ dose calculation (Table 2) [15].

118 The organ doses were further integrated into the effective dose considering tissue weighted factor  
119 provided by International Commission on Radiological Protection (ICRP) 2007 (Table 2) [8, 16]. The  
120 equation for the effective dose calculation is as followed;  $E = \sum WT \times HT$ , where E is effective dose,  
121 WT is the tissue weighting factor and HT is radiation weighed organ dose [16].

### 122 **3. Monte Carlo simulation**

123 Monte Carlo (MC) simulation is a widely used technique in the probabilistic analysis where random  
124 numbers are used for simulating the transport of radiation in complex medium such as human body  
125 [17]. When the physical information about x-ray examination technique was given, computer calculates  
126 organ absorbed dose with a MC simulation. In this study, commercial software commonly used in  
127 medical radiation dose calculation, PCXMC20Rotation (STUK, Helsinki, Finland) was used.  
128 According to the software manual, following factors were set for the software running; input dose,  
129 reference point, x-ray tube voltage, filtration, source-to-reference distance, x-ray beam width and height  
130 at reference point.

131 As an input dose, the exposure dose from the unit, dose-area-product (DAP, mGy·cm<sup>2</sup>) was selected  
132 and measured with DAP meter (VacuDAPTM; VacuTec Meßtechnik GmbH, Dresden, Germany). For  
133 respective examination mode, measurement was performed twice and the mean value was used (Fig 3).  
134 The reference point, the center of the x-ray unit during rotating through which all x-ray beams pass,  
135 was referenced to the previous literatures and marked as 3 dimensional coordination on X, Y, Z-axis  
136 (Fig. 4) [5, 10]. In addition, x-ray tube voltage, filtration and source-to-reference distance, beam width  
137 and height at reference point, were according to each examination mode in the specification of  
138 individual CBCT unit, provided by manufacturer (Table 1).

139

## 140 **Result**

141 The mean DAP value measured with DAP meter was 215.1, 91.0, 176.6 and 167.9 mGy·cm<sup>2</sup>  
142 respectively for facial, dual jaw, large jaw and jaw mode (Table 3). OSLD measured effective dose  
143 showed tendency of high value compared to that obtained with MC method. Only Dual jaw mode of  
144 CS9300 showed higher effective dose in MC method compared to OSLD method. The percent  
145 difference between the two methods was in the range of 4.0 to 14.3 %. The dose difference between the  
146 methods was decreased as the examination FOV decreased (Table 4). Organ dose were varied according  
147 to the method, while overall trend was similar in both methods (Fig 5). In other words, the organs

148 irradiated relatively low dose in OSLD method mostly showed low dose in MC method. Organs with  
149 high dose in OSLD method also showed high dose in MC method. In both method, oral mucosa and  
150 salivary gland were two most irradiated organs (Fig 5).

151

## 152 **Discussion**

153 Since the development of CBCT in the dental field, the usage of it has been growing rapidly, and  
154 research on its radiation dose has always been of interest. For now, various CBCT models from  
155 numerous manufacturer equipped with different exposure mode. In other words, exposure dose as well  
156 as patient absorbed or effective dose are varied on each CBCT machines of different examination mode.  
157 In 2015, Ludlow et al. meta-analyzed the effective dose study of CBCT conducted with dosimetry  
158 measurement. The value was widely varied from 46 to 1073  $\mu\text{Sv}$  for large field of view (FOV) and 9-  
159 560  $\mu\text{Sv}$  for medium FOV in each machines [3]. Assumed facial and large jaw mode as large and dual  
160 jaw and jaw mode as medium, our study, both OSLD and MC method, showed effective dose included  
161 in this range, regardless of the method. The major contribution to the wide range of effective dose in  
162 different CBCT units of similar FOV would be probably different exposure conditions of each machines,  
163 however, different dose measurement method also influenced to raise deviations of overall effective  
164 dose assessment [3]. Thus, consensus in dose evaluation method is consequently needed for  
165 comparative analysis in effective dose reporting of each machine. This consequently helps to construct  
166 database of patient dose and setting nation-wide regulation for the CBCT dose. Ludlow et al. studied  
167 the effective dose with OSLD and the same CBCT unit used in this study, CS9300, and reported 204  
168 and 76  $\mu\text{Sv}$  respectively for facial and dual jaw mode [3]. Even though the same method and materials  
169 were used for dose evaluation, the effective dose values showed differences even greater or similar than  
170 that between OSLD and MC method. This was probably caused by the sampling error, as it was also  
171 mentioned by Loudlow et al [3]. The sampling error is defined as the influence of location, distribution  
172 and the number of dosimeter used in each organ to the measured value. It is difficult to use the same  
173 number of dosimetry in every experiment performed by different experimenters, due to the practical

174 reason such as cost of dosimetry. Also, phantom positioning within the CBCT unit during the exposure  
175 is another challenging part causing large deviation in resulting organ dose and the effective dose.

176 On such aspect, application of MC method might be more reproducible and practical while accurate.  
177 First of all, the effective dose obtained with MC simulation was relatively good agreement with that  
178 obtained with OSLD that the percent differences were under 15 %. Toivonen et al.[18] assumed as  
179 ‘good’ in agreement when the difference between the dosimetry and computer simulated methods is  
180 below 25 %. Second, user dependent factors were limited in MC method during the whole measurement  
181 process. According to the previous studies adopted MC method for dose evaluation, machine geometry,  
182 such as filtration, tube voltage, x-ray beam width or height and source-to-subject distance, are the  
183 information required for the simulation [10, 19, 20]. For the current study, manufacturer of the machine  
184 provided required information in the specification. This method is also efficient in that it cost less than  
185 preparing human tissue-equivalent phantom, dosimetry, and dosimetry reading device.

186 There is important consideration for adopting MC method currently. The virtual phantom used for  
187 the simulation should be standardized [21]. In 2009, ICRP introduced reference phantom of female and  
188 male adult which is based on the actual computed tomographic data of adult human [22]. Among  
189 previous studies, only one adopted ICRP reference phantom and others used computed tomographic  
190 scan data of Rando-alderson phantom [11, 23]. In present study, the Cristy and Eckerman phantom  
191 facilitated in software was used without any modification. The Cristy and Eckerman phantom was  
192 describing human body organs as simplified form using cone, ball or cylinder shape. Compared to the  
193 ICRP reference phantom, it is not sophisticated enough to simulate precise organ absorbed and effective  
194 dose in dental CBCT, exposing relatively low dose compared to medical CT.

195 This probably contributed to the difference between the dose from OSLD method and MC simulation,  
196 as well, in this study. Ludlow et al.[3] in 2015 mentioned that DAP is not appropriate to be used for  
197 obtaining effective dose. This statement is true, if we simply convert DAP value into effective dose  
198 using converting coefficient. Several studies attempted to find converting coefficient to obtain effective  
199 dose of CBCT, while coefficients are different by individual CBCT model with unique geometry [24,



200 25]. On the contrary, MC simulation calculates the effective dose taking individual machine geometry  
201 into the consideration. Thus, it may produce more precise results based on the DAP value, compared to  
202 the simple conversion method of DAP value into effective dose.

203 In the present study, DAP measurement was performed using DAP meter. DAP measurement  
204 procedure is not experimenter specific, still, it requires equipment composed of ion chamber, DAP  
205 meter and cables. Also, the procedure takes time and experimenter's labor. Fortunately, recent CBCT  
206 machines provide DAP value according to the exposure condition. Though, this value is not real-time  
207 measured, and predetermined value by the manufacturer, MC simulation software with precise  
208 reference phantom, it may be possible to obtain an approximate effective dose which is not depended  
209 on the experimenter or the measurement method.

210 In conclusion, the effective dose by individual CBCT models and examination modes is continuously  
211 reported and large data has been accumulated up to now [3, 26]. To contribute for this big data  
212 accumulation, the effective dose obtained by two different methods and CBCT machines was reported  
213 in this study. The ultimate goal of the effective dose assessment and data accumulation is a dose  
214 reduction and regulation for patient's benefit. To attain this, more importantly, consensus in dose  
215 evaluation method is essential. In addition, development of a relatively accurate and easy-handling  
216 method would contribute more dose data acquisition. Therefore, we carefully suggest MC simulation  
217 based on reference phantom for further dose evaluation.

218

## 219 **Acknowledgement**

220 This research was supported by Basic Science Research Program through the National Research  
221 Foundation of Korea (NRF) funded by the Ministry of Education (No. 2017R1D1A1B03033218)

222

223 **Reference**

- 224 **1.** Hart D, Hillier M, Wall B. National reference doses for common radiographic, fluoroscopic and  
225 dental Xray examinations in the UK. *The British journal of radiology*. Br J Radiol. 2009;82(973):1-12.
- 226 **2.** Loubele M, Bogaerts R, Van Dijck E, et al. Comparison between effective radiation dose of CBCT  
227 and MSCT scanners for dentomaxillofacial applications. *European journal of radiology*. Eur J Radiol.  
228 2009;71(3):461-8.
- 229 **3.** Ludlow J, Timothy R, Walker C, et al. Effective dose of dental CBCT—a meta analysis of published  
230 data and additional data for nine CBCT units. *Dentomaxillofac Radiol*. 2015;44(1):20140197
- 231 **4.** Yepes JF, Booe MR, Sanders BJ, et al. Pediatric Phantom Dosimetry of Kodak 9000 Cone-beam  
232 Computed Tomography. *Pediatr Dent*. 2017;39(3):229-232
- 233 **5.** Koivisto J, Kiljunen T, Tapiovaara M, Wolff J, Kortetniemi M. Assessment of radiation exposure in  
234 dental cone-beam computerized tomography with the use of metal-oxide semiconductor field-effect  
235 transistor (MOSFET) dosimeters and Monte Carlo simulations. *Oral Surg Oral Med Oral Pathol Oral*  
236 *Radiol*. 2012;114(3):393-400.
- 237 **6.** Sarabayrouse G, Siskos S. Radiation dose measurement using MOSFETs. *IEEE Instrumentation &*  
238 *Measurement Magazine*. 1998;1(2):26-34.
- 239 **7.** Jursinic PA. Characterization of optically stimulated luminescent dosimeters, OSLDs, for clinical  
240 dosimetric measurements. *Med Phys*. 2007;34(12):4594-604.
- 241 **8.** Ludlow JB, Walker C. Assessment of phantom dosimetry and image quality of i-CAT FLX cone-  
242 beam computed tomography. *Am J Orthod Dentofacial Orthop*. 2013;144(6):802-17.
- 243 **9.** Morant JJ, Salvadó M, Casanovas R, Hernández-Girón I, Velasco E, Calzado A. Validation of a  
244 Monte Carlo simulation for dose assessment in dental cone beam CT examinations. *Phys Med*.  
245 2012;28(3):200-9.
- 246 **10.** Lee C, Lee S-S, Kim J-E, et al. Comparison of dosimetry methods for panoramic radiography:  
247 thermoluminescent dosimeter measurement versus personal computer-based Monte Carlo method  
248 calculation. *Oral Surg Oral Med Oral Pathol Oral Radiol*. 2016;121(3):322-9.

- 249 **11.** Ernst M, Manser P, Dula K, Volken W, Stampanoni M, Fix M. TLD measurements and Monte  
250 Carlo calculations of head and neck organ and effective doses for Cone Beam Computed Tomography  
251 using 3D Accuitomo 170. *Dentomaxillofac Radiol.* 2017;46(7):20170047.
- 252 **12.** Jursinic PA. Changes in optically stimulated luminescent dosimeter (OSLD) dosimetric  
253 characteristics with cumulated dose. *Med Phys.* 2010;37(1):132-40.
- 254 **13.** Cristy M. Active bone marrow distribution as a function of age in humans. *Phys Med Biol.*  
255 1981;26(3):389-400.
- 256 **14.** International Commission on Radiation Units and Measurements. *Physical Aspect of Radiation.*  
257 Washington , DC1963.
- 258 **15.** Ludlow J, Davies-Ludlow L, Brooks S. Dosimetry of two extraoral direct digital imaging devices:  
259 NewTom cone beam CT and Orthophos Plus DS panoramic unit. *Dentomaxillofac Radiol.*  
260 2003;32(4):229-34.
- 261 **16.** Valentin J. *The 2007 recommendations of the international commission on radiological protection:*  
262 Elsevier Oxford; 2007.
- 263 **17.** Tapiovaara M, Siiskonen T. PCXMC, A Monte Carlo program for calculating patient doses in  
264 medical x-ray examinations. *J ICRU.* 2005;5(2):100-2.
- 265 **18.** Toivonen M, Aschan C, Rannikko S, Karuka K, Savolainen S. Organ dose determinations of x-ray  
266 examinations using TL detectors for verification of computed doses. *Radiat Prot Dosimetry.* 1996;66(1-  
267 4): 298-294.
- 268 **19.** DeMarco J, Cagnon C, Cody D, et al. A Monte Carlo based method to estimate radiation dose from  
269 multidetector CT (MDCT): cylindrical and anthropomorphic phantoms. *Phys Med Biol.*  
270 2005;50(17):3989-4004.
- 271 **20.** Podnieks E, Negus I. Practical patient dosimetry for partial rotation cone beam CT. *The British*  
272 *journal of radiology.* *Br J Radiol.* 2012;85(1010):161-7.
- 273 **21.** Zhang G, Marshall N, Bogaerts R, Jacobs R, Bosmans H. Monte Carlo modeling for dose  
274 assessment in cone beam CT for oral and maxillofacial applications. *Med Phys.* 2013;40(7):072103

- 275   **22.** ICRP. Adult Reference Computational Phantoms. Vol ICRP Publication 1102009.
- 276   **23.** Morant J, Salvadó M, Hernández-Girón I, Casanovas R, Ortega R, Calzado A. Dosimetry of a cone  
277 beam CT device for oral and maxillofacial radiology using Monte Carlo techniques and ICRP adult  
278 reference computational phantoms. *Dentomaxillofac Radiol.* 2013;42(3):92555893.
- 279   **24.** Kim D-S, Rashsuren O, Kim E-K. Conversion coefficients for the estimation of effective dose in  
280 cone-beam CT. *Imaging science in dentistry. Imaging Sci Dent.* 2014;44(1):21-9.
- 281   **25.** Shin H, Nam K, Park H, Choi H, Kim H, Park C. Effective doses from panoramic radiography and  
282 CBCT (cone beam CT) using dose area product (DAP) in dentistry. *Dentomaxillofac Radiol.*  
283 2014;43(5):20130439.
- 284   **26.** Pauwels R, Beinsberger J, Collaert B, et al. Effective dose range for dental cone beam computed  
285 tomography scanners. *European journal of radiology. Eur J Radiol.* 2012;81(2):267-71.
- 286

287 Table 1. Exposure conditions of different modes in the CS9300 (Carestream Dental LLC, Atlanta, Georgia) and  
 288 RAYSCAN  $\alpha$ + (Ray Co. Ltd, Hwaseong-si, Korea)

|                                      | CS9300    |          | RAYSCAN $\alpha$ + |         |
|--------------------------------------|-----------|----------|--------------------|---------|
|                                      | Facial    | Dual jaw | Large jaw          | Jaw     |
| Field of view, cm                    | 17 x 13.5 | 10 x 10  | 16 x 10            | 10 x 10 |
| Tube voltage, kVp                    | 90        |          | 80                 |         |
| Tube current, mA                     | 8         | 8        | 12                 | 12      |
| Exposure time, s                     | 20        | 12       | 14                 |         |
| Rotation angle, °                    |           |          | 360                |         |
| Filtration, mmAl                     |           |          | 2.8                |         |
| X-ray source to patient distance, cm | 49.50     |          | 55.88              |         |
| Beam height (at rotation center), cm | 13.5      | 10       | 10                 |         |
| Beam width (at rotation center), cm  | 17        | 10       | 16                 | 10      |

289

290 Table 2. Estimated fraction irradiated in tissues and tissue weighting factors recommended by the International  
 291 Commission on Radiological Protection (ICRP)

|                       | Fraction irradiated (%) | Tissue weighting factor | OSLD ID                |
|-----------------------|-------------------------|-------------------------|------------------------|
| Bone marrow           | 12.2                    | 0.12                    |                        |
| Mandible              | 0.8                     |                         | 14, 15                 |
| Calvaria              | 7.7                     |                         | 1, 2                   |
| Cervical spine        | 3.8                     |                         | 19                     |
| Thyroid               | 100                     | 0.04                    | 21, 22                 |
| Esophagus             | 10                      | 0.04                    | 16                     |
| Skin                  | 5                       | 0.01                    | 13, 20                 |
| Bone surface*         | 16.5                    | 0.01                    |                        |
| Mandible              | 1.3                     |                         | 14, 15                 |
| Calvaria              | 11.8                    |                         | 1, 2                   |
| Cervical spine        | 3.4                     |                         | 21                     |
| Salivary glands       | 100                     | 0.01                    |                        |
| Parotid               | 100                     |                         | 14, 15                 |
| Submandibular         | 100                     |                         | 17, 18                 |
| Brain                 | 100                     | 0.01                    | 3, 4, 5, 6, 9, 10      |
| Remainder tissue      |                         | 0.12                    |                        |
| Lymphatic nodes       | 5                       |                         | 14, 15, 17, 18, 19     |
| Muscle                | 5                       |                         | 14, 15, 17, 18, 19     |
| Extrathoracic airways | 100                     |                         | 14, 15, 17, 18, 16     |
| Oral mucosa           | 100                     |                         | 14, 15, 16, 17, 18, 19 |
| Eyes                  | 100                     |                         | 7, 8                   |

292 \* Bone surface = bone marrow dose × bone/muscle mass energy absorption coefficient ratio (MEACR), MEACR

293 = 0.0618 x 2/3 kVp + 6.9406 [14].

294 Table 3. Mean and standard deviation of Dose-Area-Product (DAP) value measured with DAP meter (mGycm<sup>2</sup>)  
295 in different mode and units of cone-beam computed tomography

| CS9300                |                       | RAYSCAN $\alpha+$      |                  |
|-----------------------|-----------------------|------------------------|------------------|
| Facial (17 x 13.5 cm) | Dual jaw (10 x 10 cm) | Large jaw (16 x 10 cm) | Jaw (10 x 10 cm) |
| 215.1 $\pm$ 0.4       | 91.0 $\pm$ 0.4        | 176.6 $\pm$ 0.4        | 167.9 $\pm$ 0.6  |

296

297

298 Table 4. The effective dose obtained with the OSLD and MC methods, and the percent difference.

|             | Effective dose ( $\mu\text{Sv}$ ) |                          |                           |                     |
|-------------|-----------------------------------|--------------------------|---------------------------|---------------------|
|             | CS9300                            |                          | RAYSCAN $\alpha+$         |                     |
|             | Facial<br>(17 x 13.5 cm)          | Dual jaw<br>(10 x 10 cm) | Large jaw<br>(16 x 10 cm) | Jaw<br>(10 x 10 cm) |
| OSLD method | 181.4                             | 90.7                     | 228.5                     | 213.8               |
| MC method   | 160.9                             | 94.4                     | 198.0                     | 195.2               |
|             | Percent difference (%)*           |                          |                           |                     |
|             | CS9300                            |                          | RAYSCAN $\alpha+$         |                     |
|             | Facial<br>(17 x 13.5 cm)          | Dual jaw<br>(10 x 10 cm) | Large jaw<br>(16 x 10 cm) | Jaw<br>(10 x 10 cm) |
|             | 12.0                              | 4.0                      | 14.3                      | 9.1                 |

299

300 \* Percent difference =  $\left| \frac{\text{effective dose (OSLD method)} - \text{effective dose (MC method)}}{\frac{1}{2} \times \text{effective dose (OSLD method)} + \text{effective dose (MC method)}} \right| \times 100$

301

302



303 **Figure legends**

304 Figure 1. Experimental setting and facilitation for optically stimulated luminescence dosimeter (OSLD)  
305 measurement. (a) OSLD encased in a holder preventing light exposure. There is identification quick  
306 response (QR) code and identification number marked on the case. (b) Human tissue equivalent  
307 phantom with dosimetry slot. (c) Dosimetry reader (MicroStar; Landauer) prepared optimal for 80  
308 kilovoltage and low dose type (<30 mGy). Each dosimetry is identified with QR code and can be read  
309 out.

310

311 Figure 2. The location of optically stimulated luminescent dosimetry (OSLD) in an adult head and neck  
312 phantom (ATOM; CIRS, Norfolk, VA, USA) with the slice number of the phantom.

313

314 Figure 3. Dose-area-product (DAP) meter (VacuDAPTM; VacuTec Meßtechnik GmbH, Dresden,  
315 Germany) for input dose measurement. Ion chamber attached on the surface of x-ray tube head for the  
316 measurement.

317

318 Figure 4. Virtual phantom and monte carlo simulation software. (a) Head and neck organs included in  
319 the virtual phantom. (b) Geometric variables required for the MC simulation and PCXMC20Rotation  
320 (STUK, Helsinki, Finland) software used in this study.

321

322 Figure 5. Organ dose of both methods according to the different CBCT unit and examination mode.

323 Note that the values varied according to each organ, while the overall trend was similar in both methods.

bioRxiv preprint doi: <https://doi.org/10.1101/675058>; this version posted June 18, 2019. The copyright holder for this preprint (which was not certified by peer review) is the author/funder, who has granted bioRxiv a license to display the preprint in perpetuity. It is made available under aCC-BY 4.0 International license.

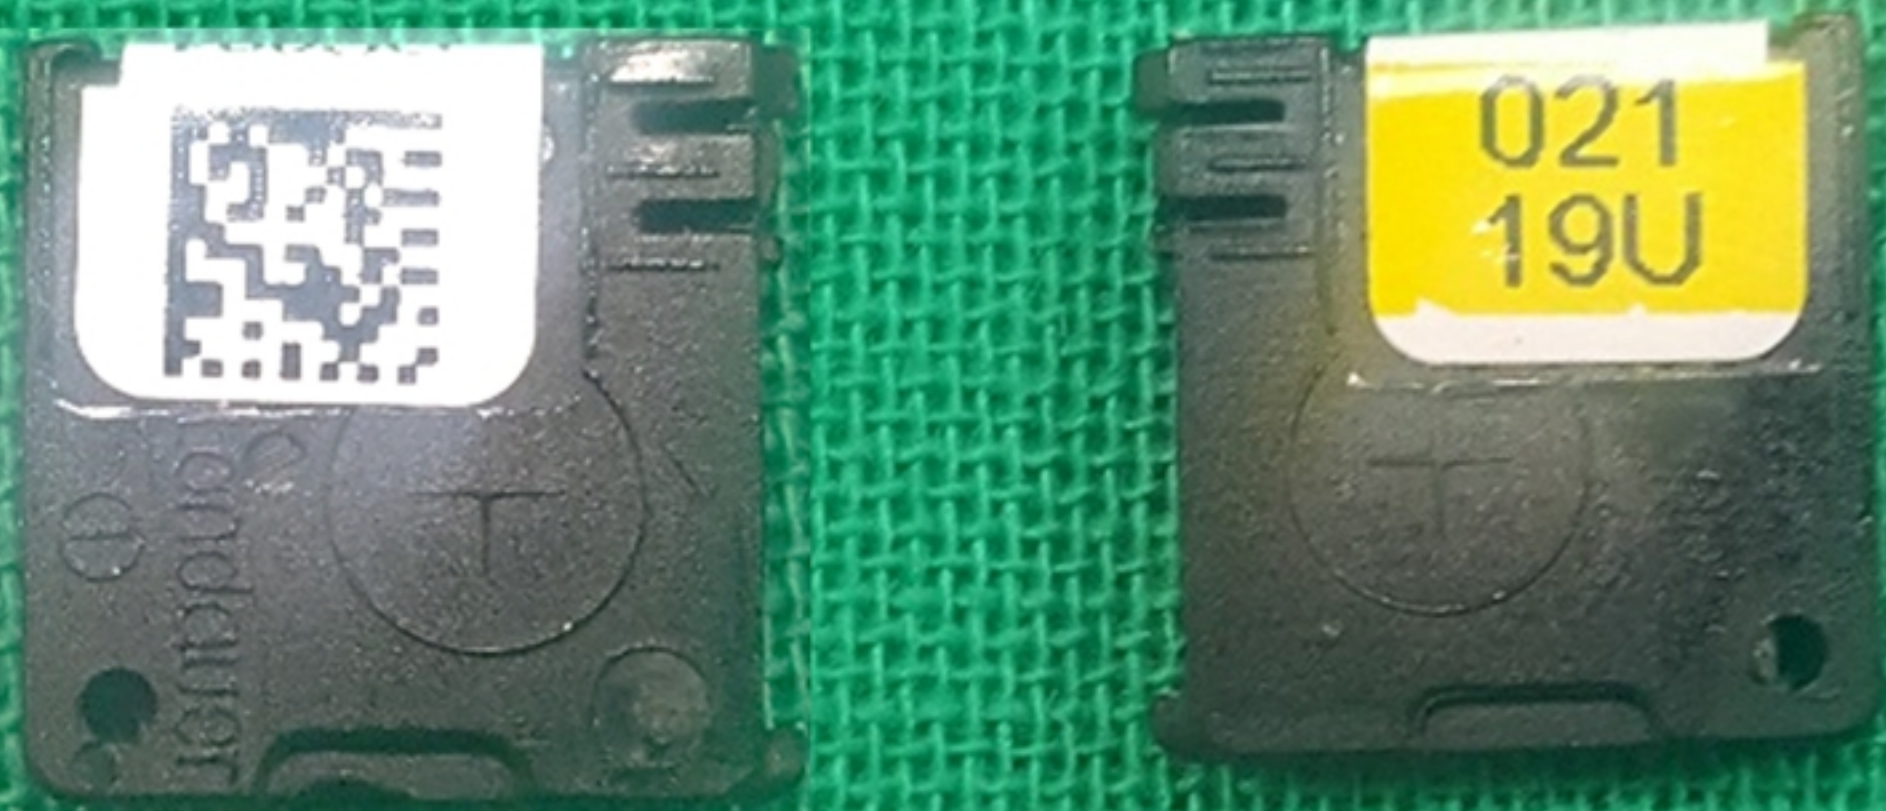

Figure 1a

bioRxiv preprint doi: <https://doi.org/10.1101/675058>; this version posted June 18, 2019. The copyright holder for this preprint (which was not certified by peer review) is the author/funder, who has granted bioRxiv a license to display the preprint in perpetuity. It is made available under aCC-BY 4.0 International license.

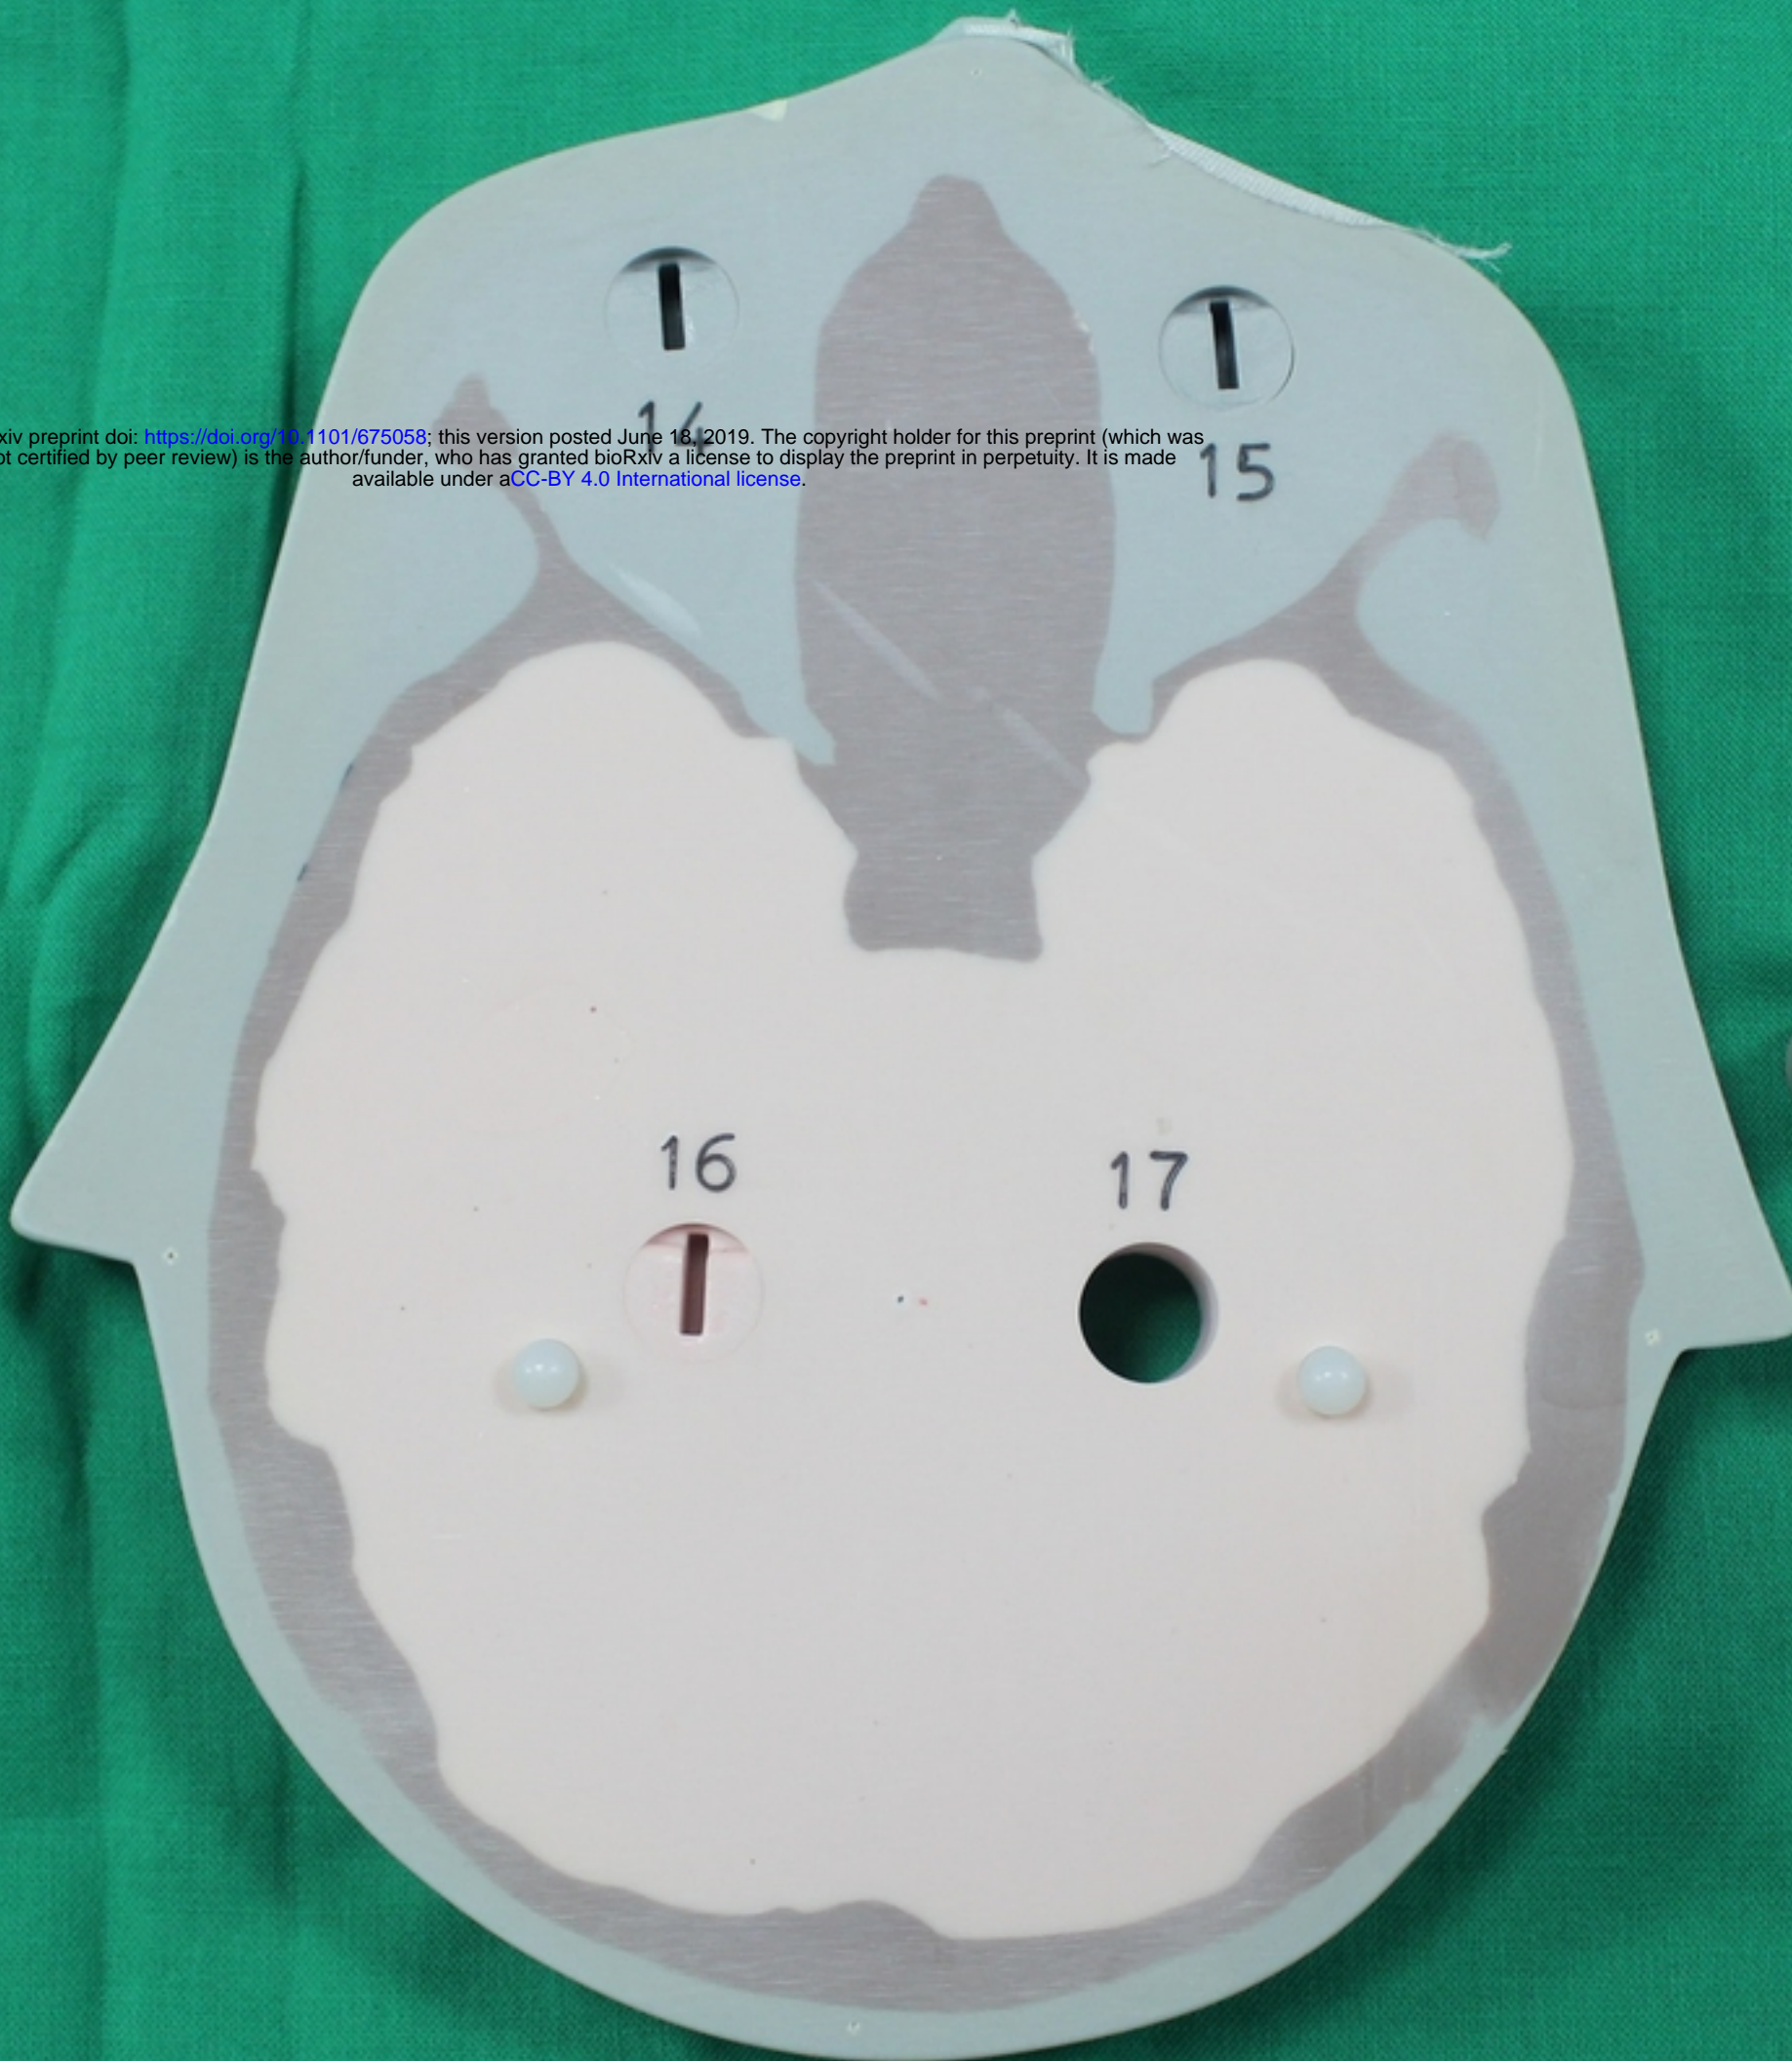

Figure 1b



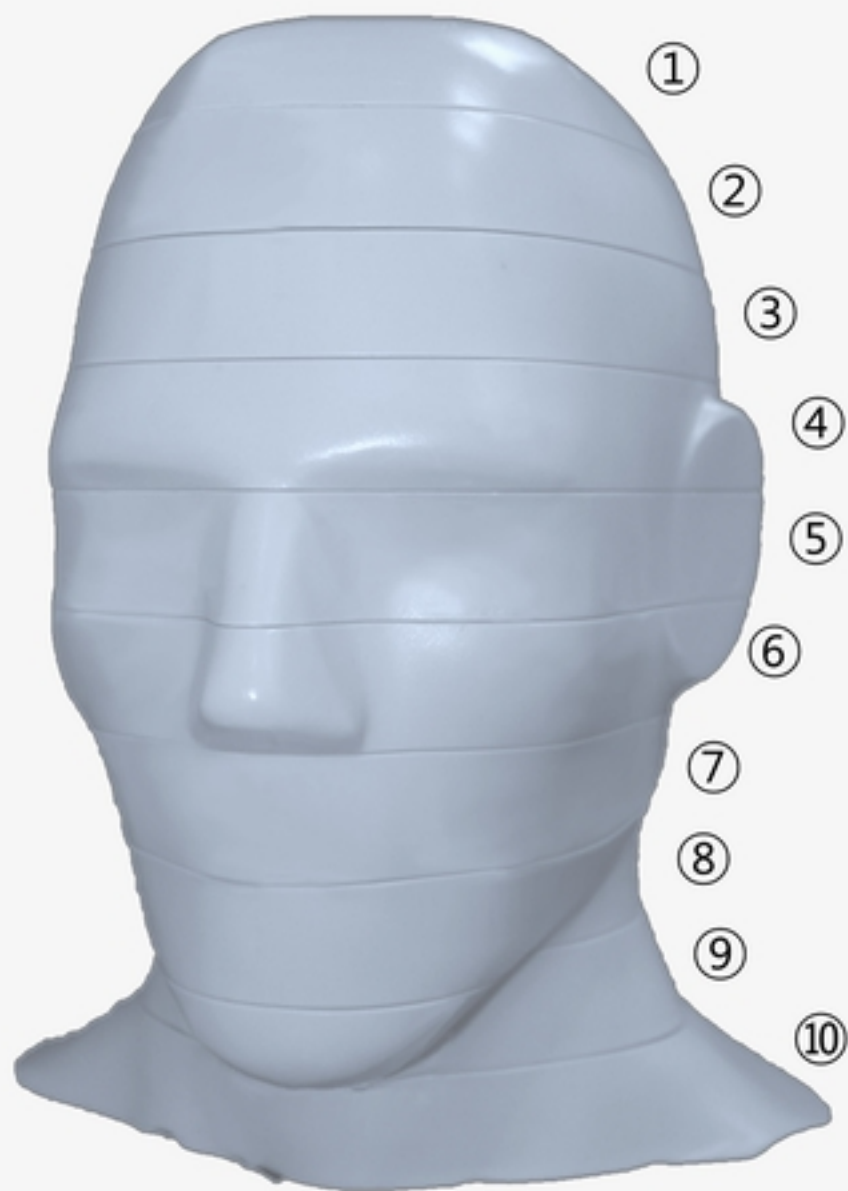

| Slice number | Dosimetry number | Tissue                           |
|--------------|------------------|----------------------------------|
| 3            | 1                | Calvarium Anterior               |
|              | 2                | Calvarium posterior              |
|              | 3                | Fronto-parietal lobe (Right)     |
|              | 4                | Parieto-occipital lobe (Left)    |
| 4            | 5                | Fronto-parietal lobe (Left)      |
|              | 6                | Fornix (Right)                   |
|              | 7                | Lens of eye (right)*             |
| 5            | 8                | Lens of eye (Left)*              |
|              | 9                | Pituitary (Right)                |
|              | 10               | Pituitary (Left)                 |
|              | 11               | Maxillary sinus (right)          |
| 6            | 12               | Maxillary sinus (Left)           |
|              | 13               | Buccal cheek (right)*            |
|              | 14               | Parotid gland (right)            |
| 7            | 15               | Parotid gland (left)             |
|              | 14               | Ramus (right)                    |
|              | 15               | Ramus (Left)                     |
| 8            | 16               | Oropharyngeal airway             |
|              | 17               | Submandibular gland (right)      |
|              | 18               | Submandibular gland (left)       |
|              | 19               | Esophagus                        |
| 9            | 19               | Cervical spine                   |
|              | 20               | Lateral and back of neck (left)* |
| 10           | 21               | Thyroid (left)                   |
|              | 22               | Thyroid (right)                  |

\* Dosimeters directly attached on the skin

Figure 2

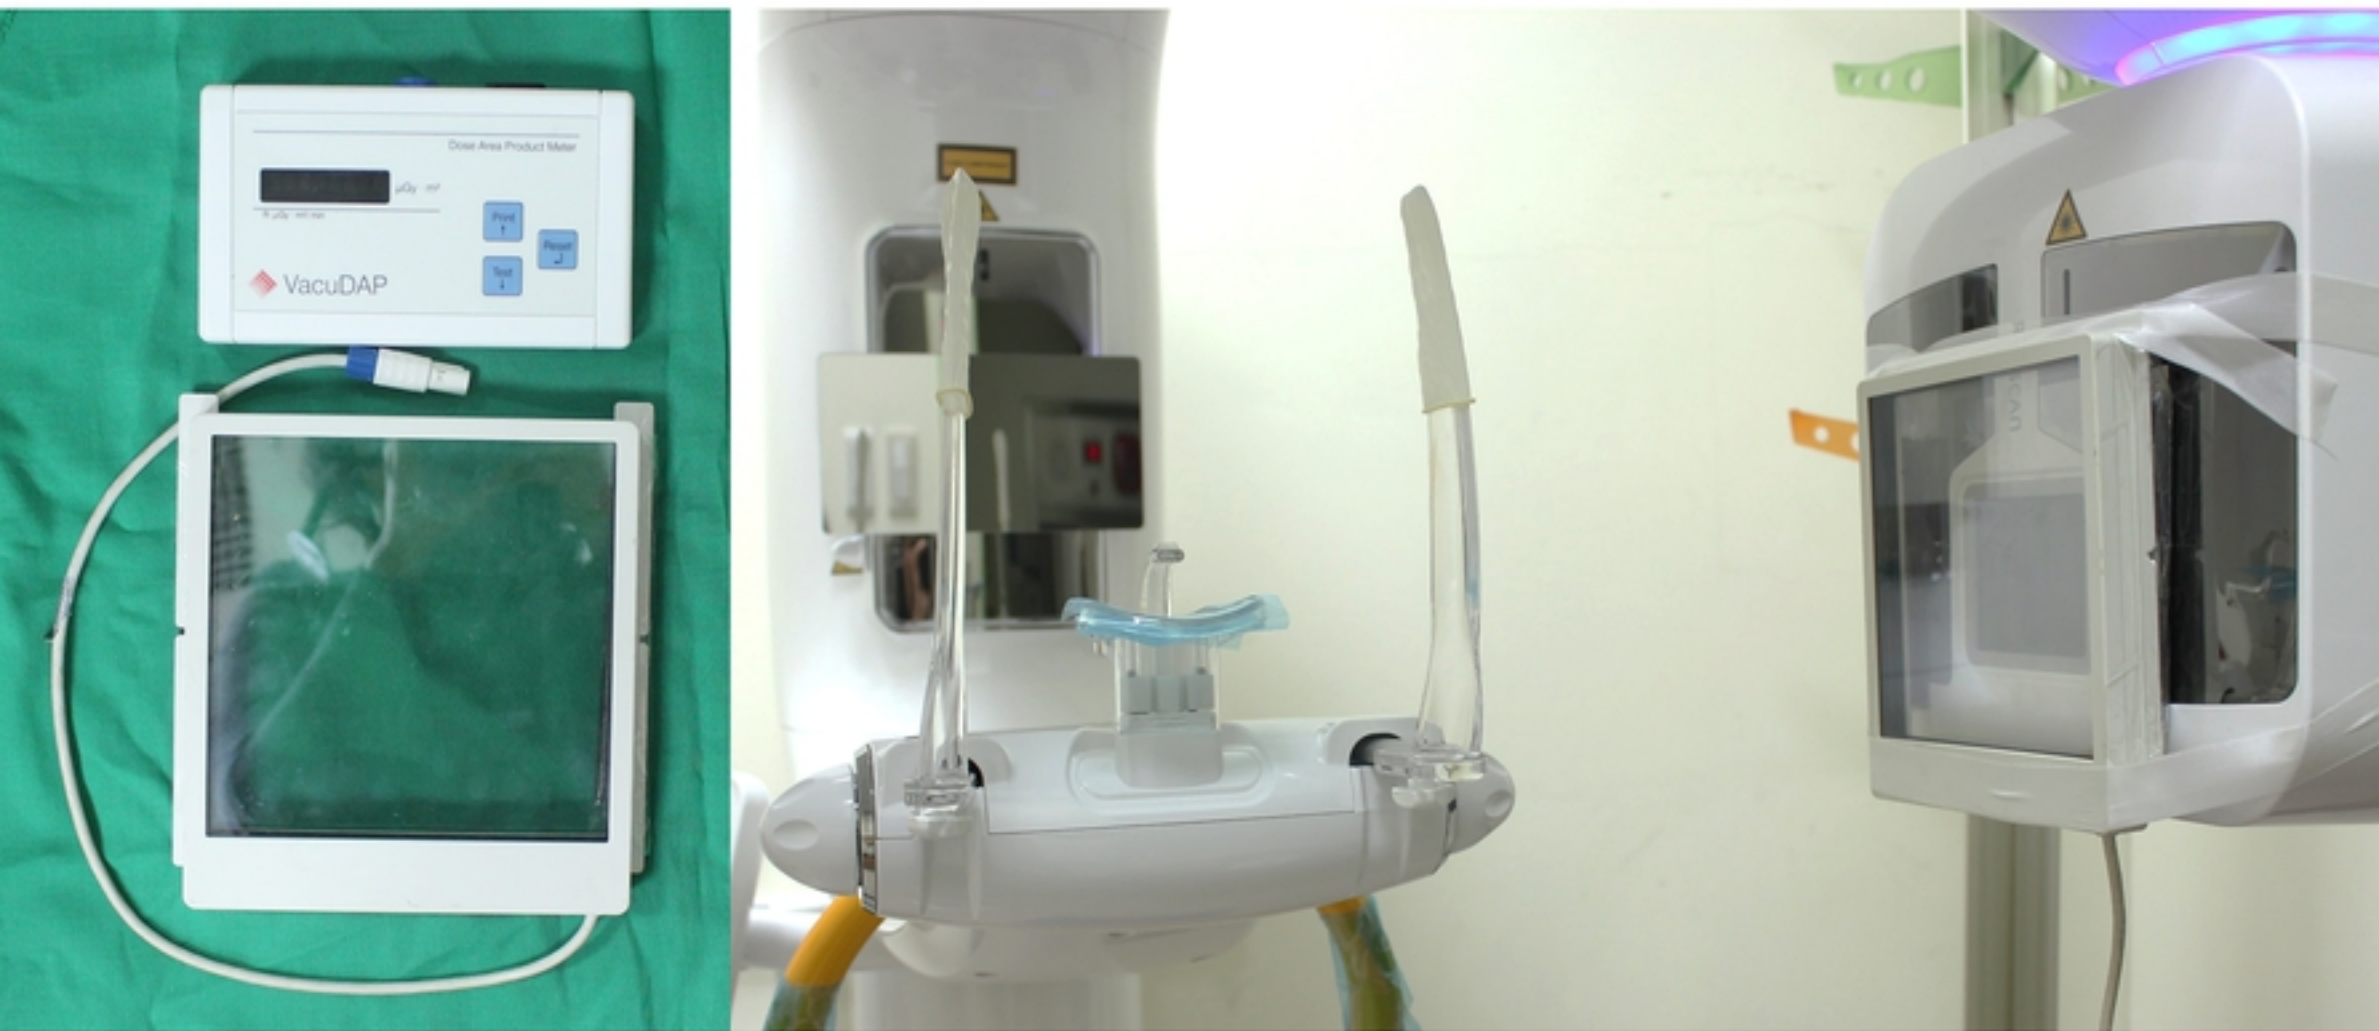

Figure 3

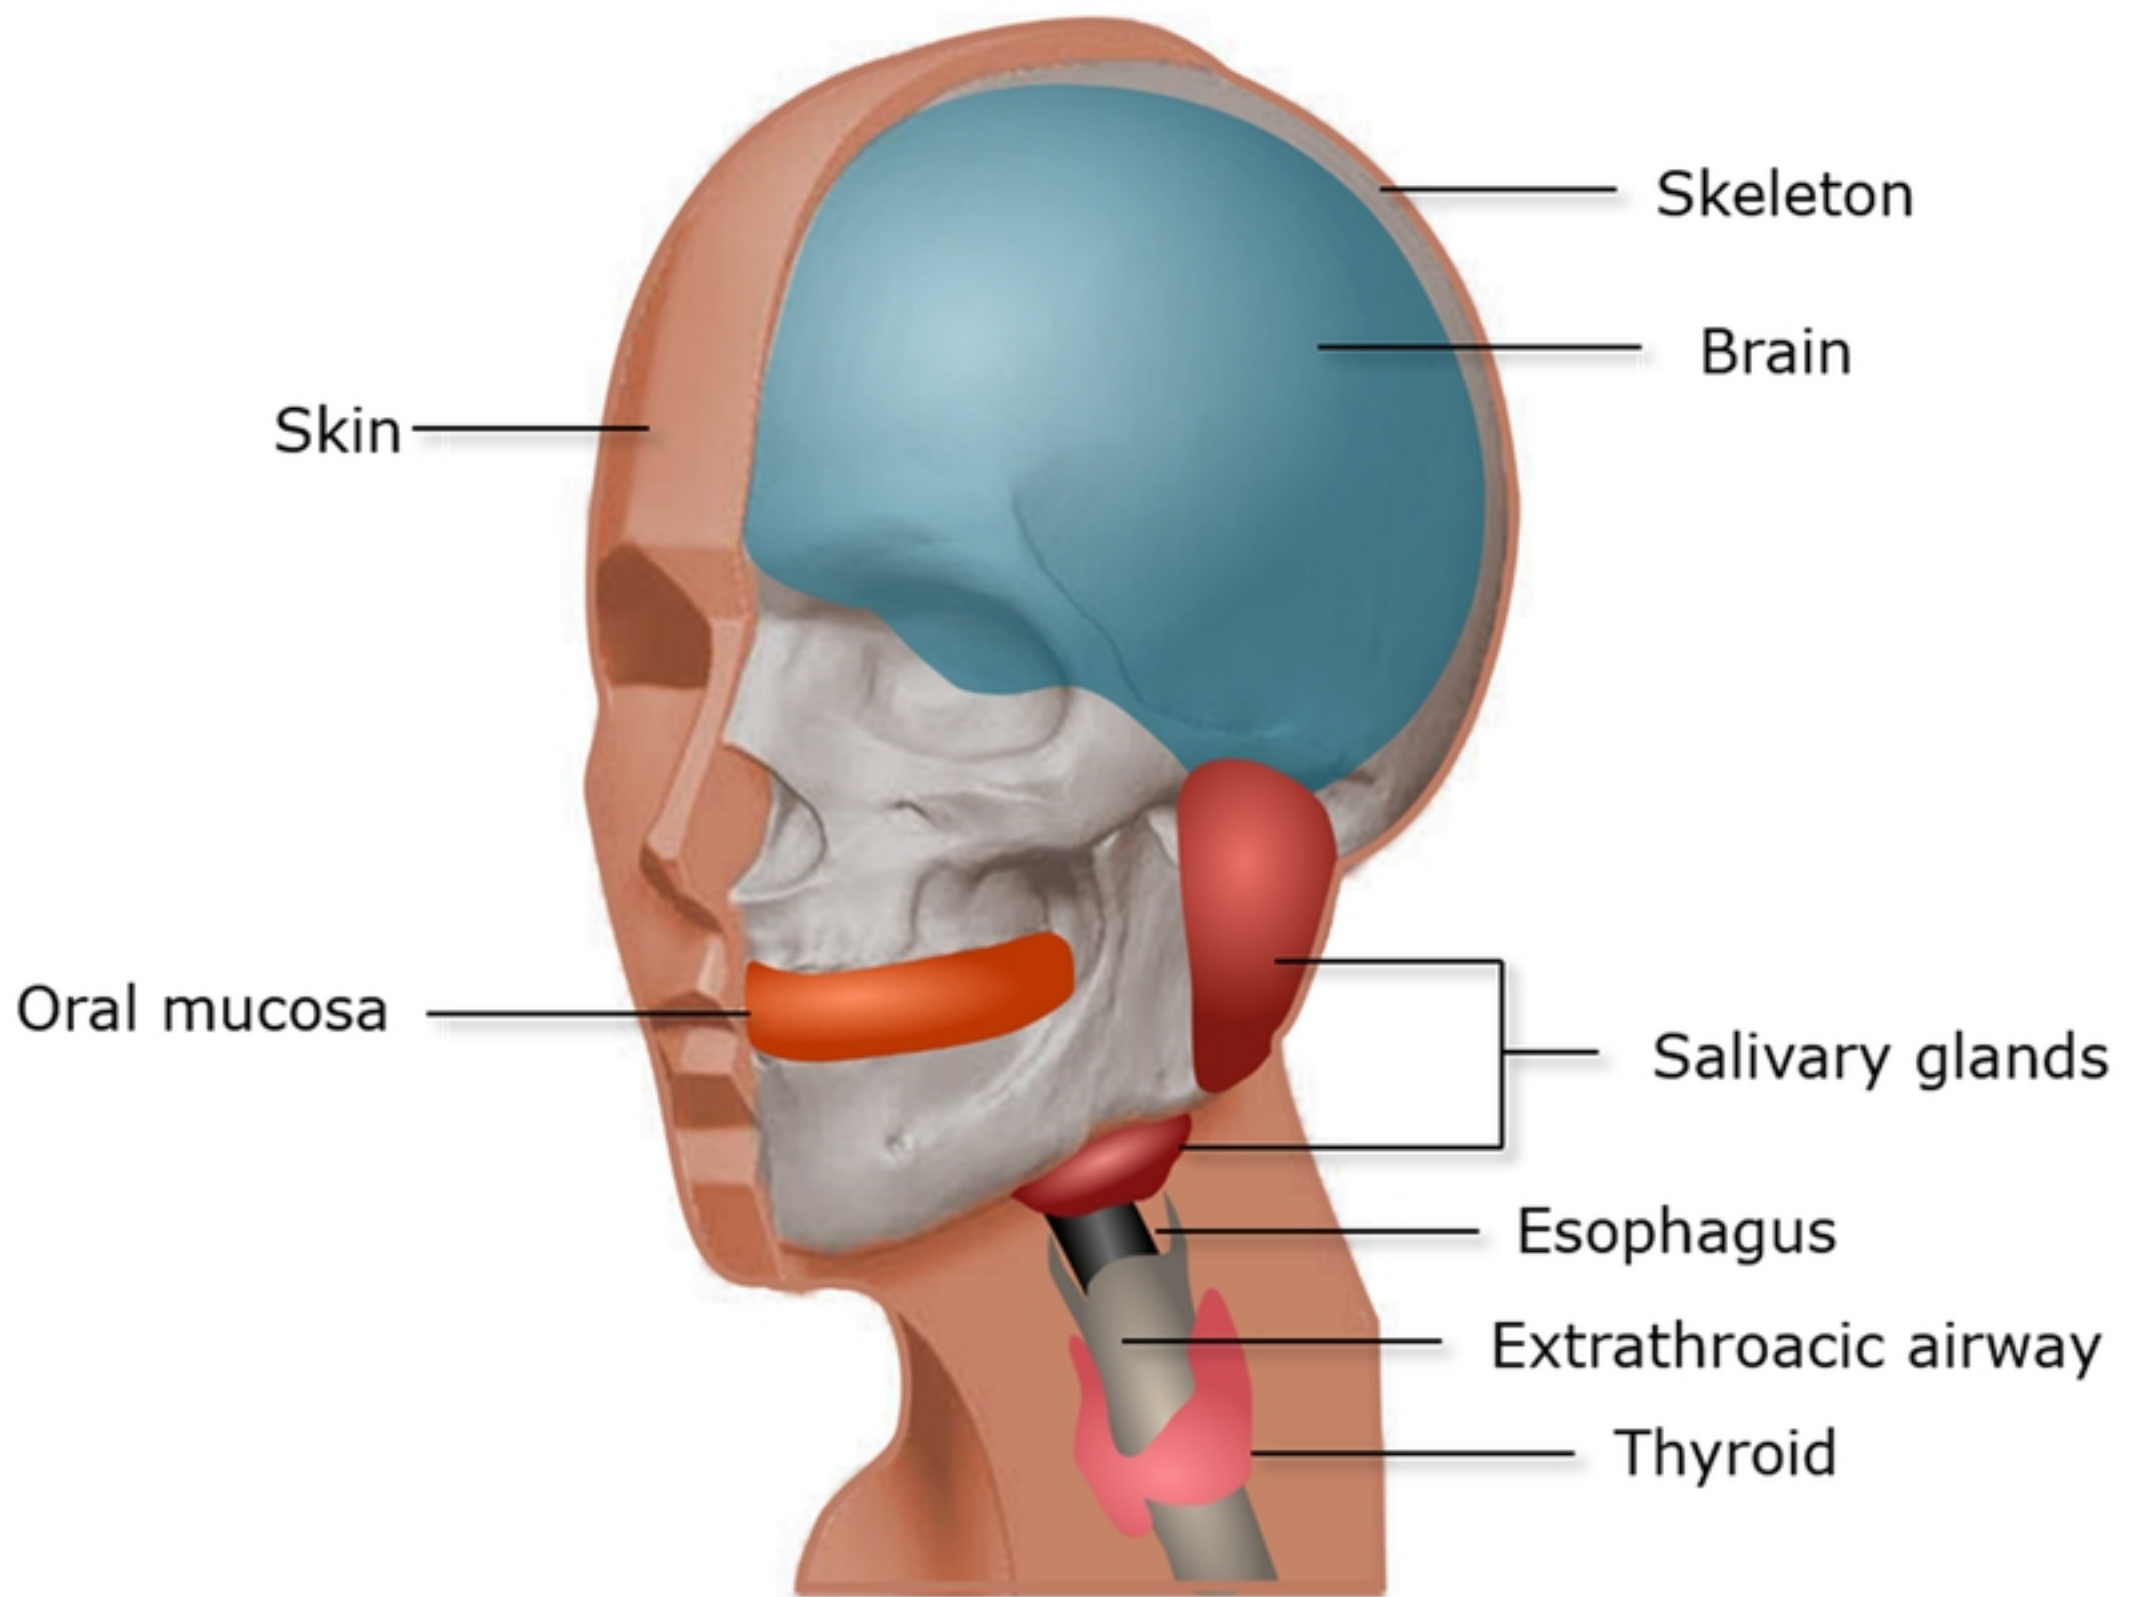

Figure 4a

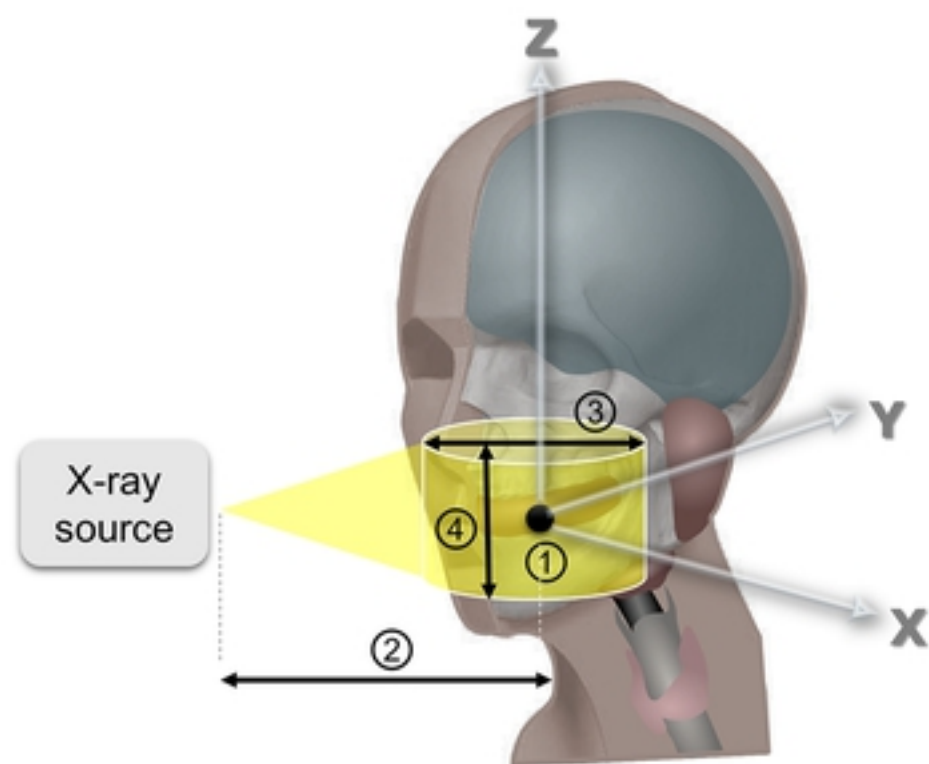

- ① Reference point in (X, Y, Z)
- ② Focus to reference point distance
- ③ Beam width
- ④ Beam height

DeForm [ ]

File | Main menu | New Form | Open Form | Save Form | Save Form As ... | Print As Text

Header text: C Mode

Phantom data

Age: 0 | 1 | 5 | 10 | 15 | Adult | Phantom height: 178.60 | Phantom mass: 73.20 | Arms in phantom:  | Standard: 178.6 | Standard: 73.2

Geometry data for the x-ray beam (RELATIVE TO RefPoint)

| FRD   | Beam width (R) | Beam height (R) | Xref   | Yref    | Zref    |
|-------|----------------|-----------------|--------|---------|---------|
| 65.00 | 20.00          | 20.00           | 0.0000 | -5.0000 | 82.0000 |

Projection angle: 270.00 | Cranio-caudal angle: 0.00  
 IATR=180 AP=270 (pos) Cranial X-ray tube | LATL=0 PA=90 (neg) Caudal X-ray tube

Draw x-ray field:  | Draw | Update Field | Stop

MonteCarlo simulation parameters

Max energy (keV): 60 | Number of photons: 20000

Field size calculator

| FRD   | FSD   | Phantom-image distance |
|-------|-------|------------------------|
| 65.00 | 60.00 | 33                     |

Beam width(R): 5.91 | Beam height(R): 5.91 | Use this data

- Bladder
- Brain
- Heart
- Testes
- Spleen
- Lungs
- Ovaries
- Kidneys
- Thyroid
- Stomach
- Salivary glands
- Oral mucosa
- Pancreas
- Uterus
- Liver
- Upper large intestine
- Lower large intestine
- Small intestine
- Thyroid
- Urinary bladder
- Gall bladder
- Oesophagus
- Prostate
- Pharynx/trachea/sinus

Rotation increment: 30 | View angle: 270

Quick | Sharp

Figure 4b



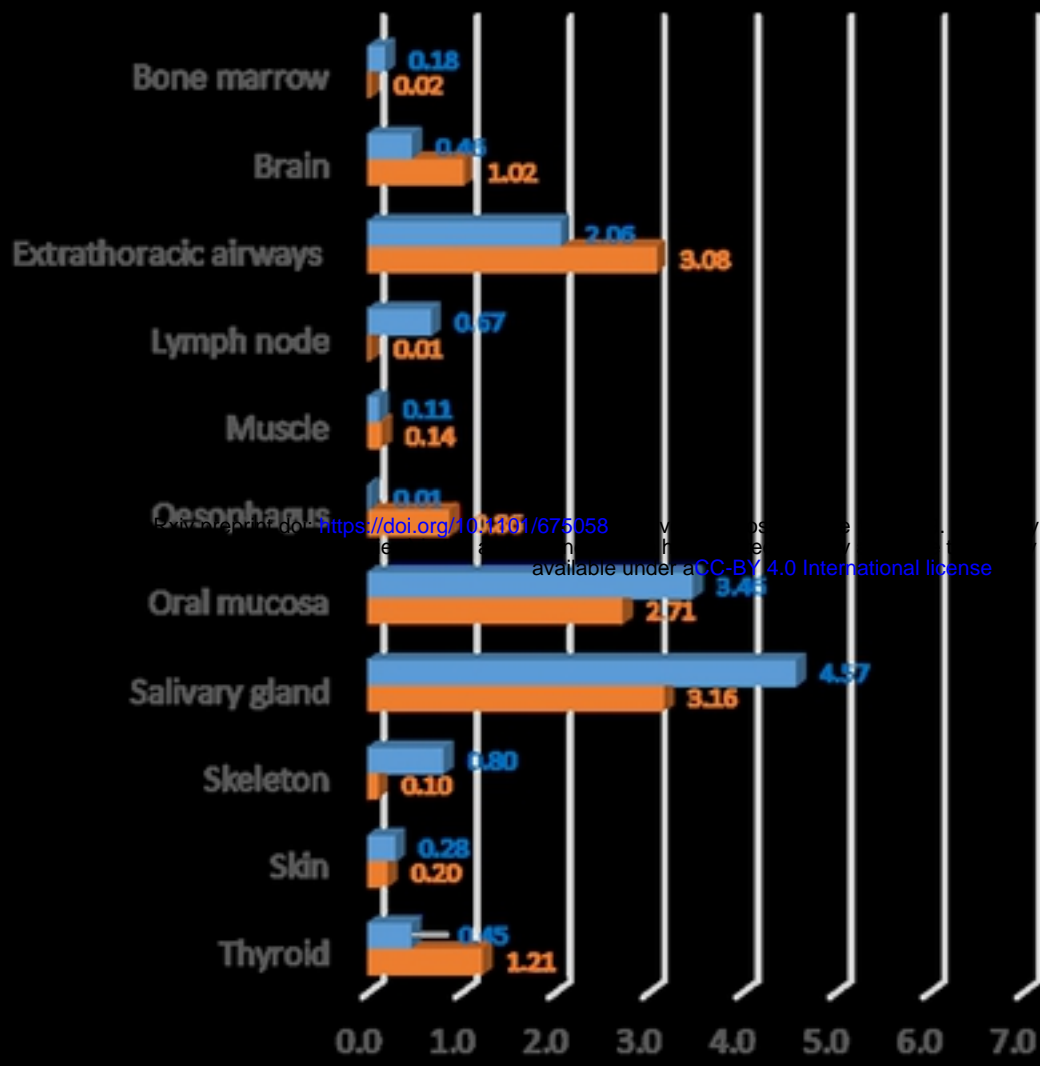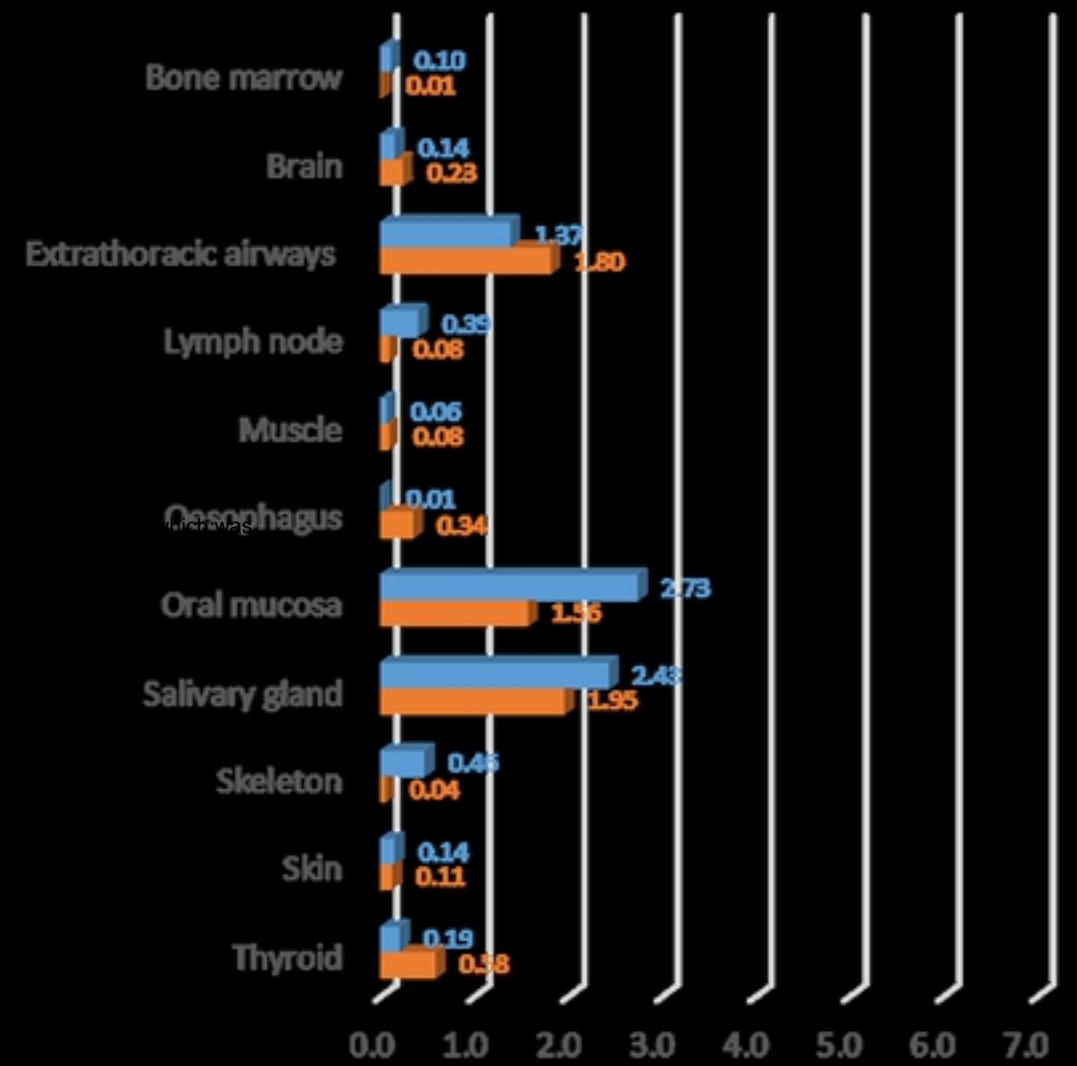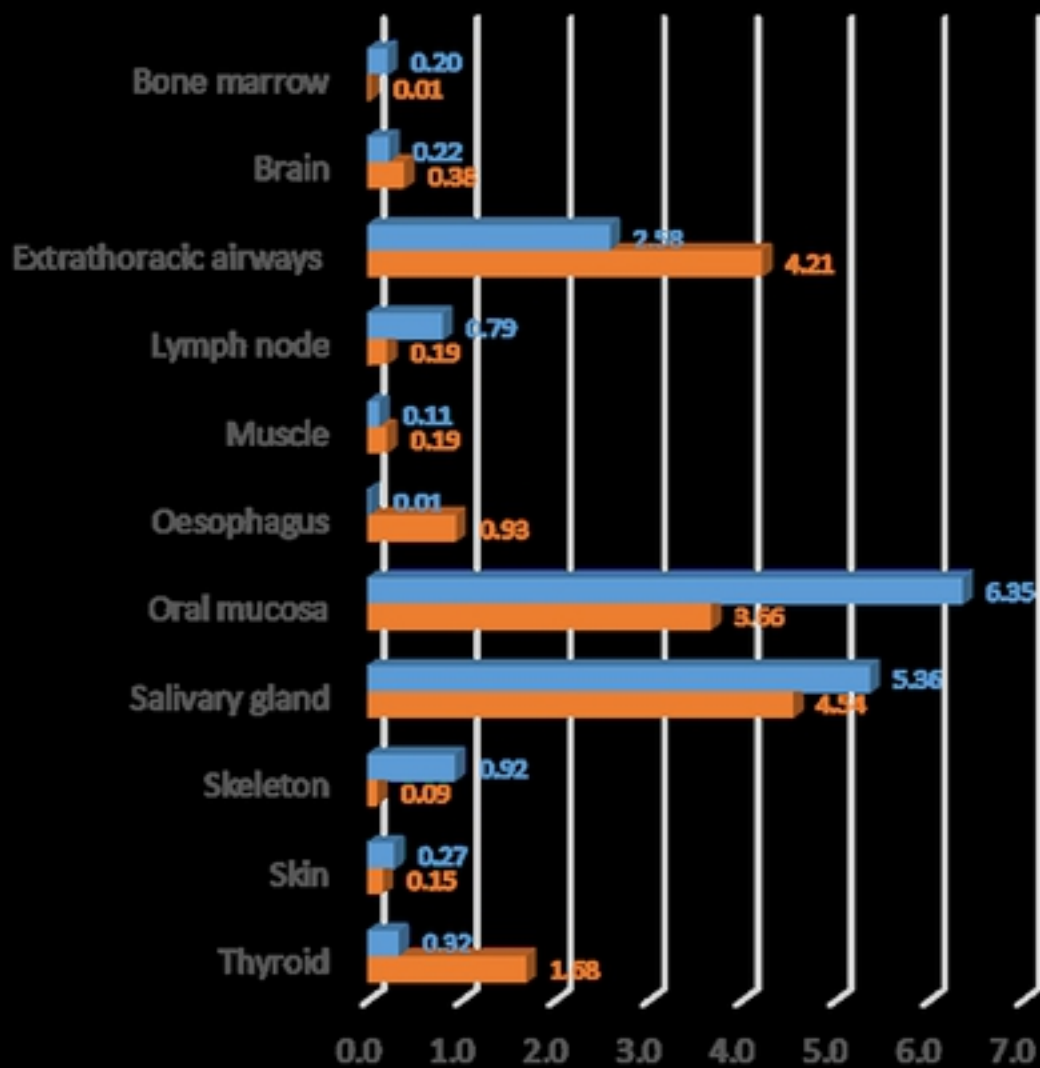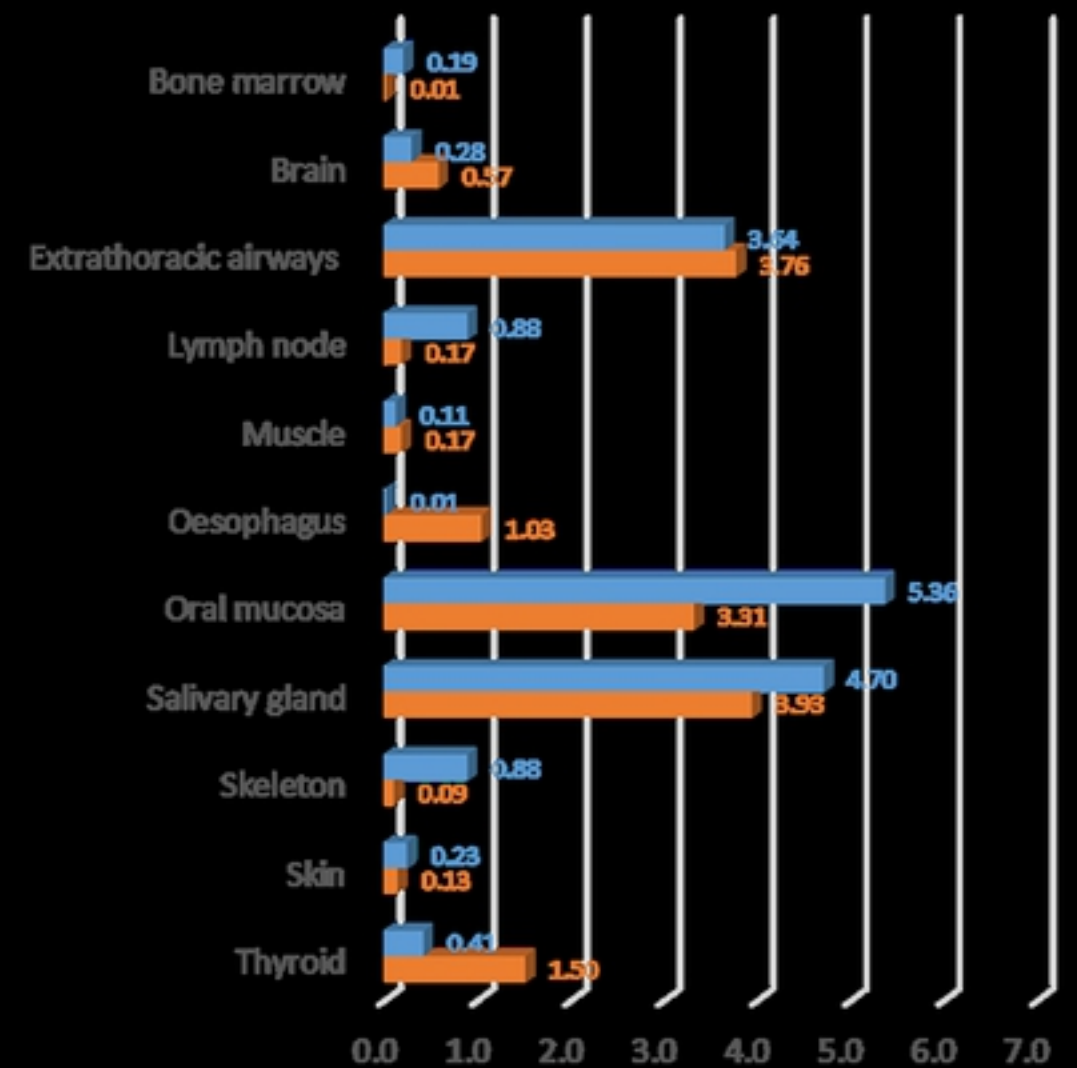

Figure 5
